# Supplementary material
Source: PubMed Central journal article supplement (PMC4136115)
Supplement: AEM.01480-14_zam999105596so1.pdf [file AEM.01480-14_zam999105596so1.pdf]

- SUPPLEMENTARY MATERIAL -

## Iron triggers $\lambda$ So prophage induction and release of extracellular DNA in *Shewanella oneidensis* MR-1 biofilms

Lucas Binnenkade<sup>a,b</sup>, Laura Teichmann<sup>a</sup>, Kai Thormann<sup>a,b</sup>#

<sup>a</sup>Max Planck Institute for terrestrial Microbiology, Marburg, Germany, Department of Ecophysiology

<sup>b</sup>Institute for Microbiology and Molecular Biology, Justus Liebig University Giessen, Germany

# Corresponding author; Mailing address:  
Institut für Mikrobiologie und Molekularbiologie  
Heinrich-Buff-Ring 26-32, 35392 Giessen, Germany  
Tel.: +49(0)641 9935545, Fax: +49(0)641 9935549  
email: kai.thormann@mikro.bio.uni-giessen.de

**Table S1** Bacterial strains and plasmids

| Bacterial strain or plasmid              | Relevant genotype                                                                                                                                    | Source or reference                                  |
|------------------------------------------|------------------------------------------------------------------------------------------------------------------------------------------------------|------------------------------------------------------|
| <b><i>Escherichia coli</i></b>           |                                                                                                                                                      |                                                      |
| DH5α λpir                                | φ80dlacZΔM15 Δ(lacZYA-argF)U169 recA1 hsdR17 deoR thi-l supE44 gyrA96 relA1/λpir                                                                     | Miller and Mekalanos (1988)s                         |
| WM3064                                   | thrB1004 pro thi rpsL hsdS lacZ ΔM15 RP4-1360 Δ(araBAD) 567ΔdapA 1341::[erm pir(wt)]                                                                 | W. Metcalf, University of Illinois, Urbana-Champaign |
| <b><i>Shewanella oneidensis</i> MR-1</b> |                                                                                                                                                      |                                                      |
| S79                                      | wild type                                                                                                                                            | Venkateswaran et al. (1999)                          |
| S176                                     | Tn7::ecfp, tagged with <i>ecfp</i> in a mini-Tn7 construct                                                                                           | Gödeke et al. (2011b)                                |
| S198                                     | Tn7::egfp, tagged with <i>ecfp</i> in a mini-Tn7 construct                                                                                           | Gödeke et al. (2011b)                                |
| S1387                                    | ΔLambdaSo (SO_2939-SO_3013)                                                                                                                          | Gödeke et al. (2011b)                                |
| S1419                                    | ΔLambdaSo ΔMuSo2 ΔMuSo1                                                                                                                              | Gödeke et al. (2011b)                                |
| S1393                                    | S198 ΔLambdaSo (SO_2939-SO_3013)                                                                                                                     | Gödeke et al. (2011b)                                |
| S2933                                    | Δlysis-operon (SO_2966-SO_2974)                                                                                                                      | This work                                            |
| S2933                                    | S198 Δlysis-operon                                                                                                                                   | This work                                            |
| S2391                                    | Tn7::ecfp Pλcro::venus, insertion of RBS and <i>venus-his6x</i> sequence downstream of putative <i>λcro</i> (SO_2989) in strain S176                 | This work                                            |
| S2502                                    | ΔrecA (SO_3430)                                                                                                                                      | This work                                            |
| S3173                                    | <i>recA</i> complementation strain, insertion of <i>recA</i> wild type copy in S2502                                                                 | This work                                            |
| S2425                                    | S2391, ΔrecA (SO_3430)                                                                                                                               | This work                                            |
| S2623                                    | Tn7::ecfp PλR'::venus, insertion of RBS and <i>venus-his6x</i> sequence upstream of SO_2974 in strain S176                                           | This work                                            |
| S2395                                    | Tn7::ecfp PλL::venus, insertion of RBS and <i>venus-his6x</i> sequence downstream of SO_2949 in strain S176                                          | This work                                            |
| S2991                                    | ΔoxyR (SO_1328)                                                                                                                                      | This work                                            |
| S2989                                    | Δfur (SO_1937)                                                                                                                                       | This work                                            |
| S2993                                    | S2391 ΔoxyR (SO_1328)                                                                                                                                | This work                                            |
| S3065                                    | S2391 Δfur (SO_1937)                                                                                                                                 | This work                                            |
| S3104                                    | <i>oxyR</i> complementation strain, insertion of <i>oxyR</i> wild type copy in S2993                                                                 | This work                                            |
| S3112                                    | <i>fur</i> complementation strain, insertion of <i>fur</i> wild type copy in S3065                                                                   | This work                                            |
| S3169                                    | Hydrogen peroxide-resistant strain, OxyR T104N substitution                                                                                          | This work                                            |
| S3170                                    | Hydrogen peroxide-resistant strain, OxyR L197P substitution                                                                                          | This work                                            |
| S3171                                    | OxyR T104N substitution in strain S2391                                                                                                              | This work                                            |
| S3172                                    | OxyR L197P substitution in strain S2391                                                                                                              | This work                                            |
| <b>Plasmids</b>                          |                                                                                                                                                      |                                                      |
| pNPTS138-R6KT                            | mobRP4 <sup>+</sup> ori-R6K <i>sacB</i> ; beta-galactosidase fragment alpha; suicide plasmid for in-frame deletions or integrations; Km <sup>r</sup> | Lassak et al. (2010)                                 |
| pNPTS138-R6KT- ΔrecA                     | Fragment for in-frame deletion of <i>recA</i> (SO_3430) in pNPTS138-R6KT; Km <sup>r</sup>                                                            | This work                                            |
| pNPTS138-R6KT- KirecA                    | <i>recA</i> wild type gene copy for complementation by insertion into locus                                                                          | This work                                            |
| pNPTS138-R6KT- Δlysis-operon             | Fragment for in-frame deletion of gene region SO_2939-SO_3013 (putative lysis operon) in pNPTS138-R6KT; Km <sup>r</sup>                              | This work                                            |
| pNPTS138-R6KT- ΔoxyR                     | Fragment for in-frame deletion of <i>oxyR</i> (SO_1328) in pNPTS138-R6KT; Km <sup>r</sup>                                                            | This work                                            |
| pNPTS138-R6KT- KoxyR                     | <i>oxyR</i> wild type gene copy for complementation by insertion into locus                                                                          | This work                                            |
| pNPTS138-R6KT- Δfur                      | Fragment for in-frame deletion of <i>fur</i> (SO_1937) in pNPTS138-R6KT; Km <sup>r</sup>                                                             | This work                                            |
| pNPTS138-R6KT- Kifur                     | <i>fur</i> wild type gene copy for complementation by insertion into locus                                                                           | This work                                            |
| pNPTS138-R6KT- Pλcro::RBS_venus-His6x    | Fragment for insertion of RBS and <i>venus-his6x</i> sequence downstream of putative <i>λcro</i> gene (SO_2989) in pNPTS138-R6KT; Km <sup>r</sup>    | This work                                            |
| pNPTS138-R6KT- PλR'::RBS_venus-His6x     | Fragment for insertion of RBS and <i>venus-his6x</i> sequence upstream of SO_2974 in pNPTS138-R6KT; Km <sup>r</sup>                                  | This work                                            |
| pNPTS138-R6KT- PλL::RBS_venus-His6x      | Fragment for insertion of RBS and <i>venus-his6x</i> sequence downstream of SO_2949 in pNPTS138-R6KT; Km <sup>r</sup>                                | This work                                            |
| pNPTS138-R6KT-KI-OxyR-T104N              | Fragment for in-frame insertion of OxyR T104N construct (H <sub>2</sub> O <sub>2</sub> resistance); Km <sup>r</sup>                                  | This work                                            |
| pNPTS138-R6KT-KI-OxyR-L187P              | Fragment for in-frame insertion of OxyR L187P construct (H <sub>2</sub> O <sub>2</sub> resistance); Km <sup>r</sup>                                  | This work                                            |

|                                      |                                                                                                        |                              |
|--------------------------------------|--------------------------------------------------------------------------------------------------------|------------------------------|
| <b>pXVENC-2</b>                      | Template vector for cloning of <i>venus</i> sequence; Km <sup>r</sup>                                  | M. Thanbichler, MPI, Marburg |
| <b>pME6031-PmotB-lacZ</b>            | Constitutive expression of <i>lacZ</i> , <i>motAB</i> promoter fused to <i>lacZ</i> , Tc <sup>r</sup>  | Gödeke <i>et al.</i> (2011b) |
| <b>pBBR1-MCS5-TT</b>                 | Terminators <i>lambda T0</i> and <i>rrnB1 T1</i> cloned into pBBR1-MCS5, Gm <sup>r</sup>               | Gödeke <i>et al.</i> (2011a) |
| <b>pBBR1-TT-MSC5-RBS-venus</b>       | Vector for promoter fusions, optimal RBS sequence upstream of <i>venus</i> gene, Gm <sup>r</sup>       | This work                    |
| <b>pBBR1-TT-MSC5-Pdps-RBS-venus</b>  | Putative promoter region of <i>dps</i> (SO_1158) in pBBR1-TT-MSC5-RBS- <i>venus</i> , Gm <sup>r</sup>  | This work                    |
| <b>pBBR1-TT-MSC5-PtonB-RBS-venus</b> | Putative promoter region of <i>tonB</i> (SO_3670) in pBBR1-TT-MSC5-RBS- <i>venus</i> , Gm <sup>r</sup> | This work                    |
| <b>pBBR1-TT-Ptac-MCS5</b>            | Tac promoter region in pBBR1-MCS5-TT for constitutive expression, Gm <sup>r</sup>                      | This work                    |
| <b>pBBR1-TT-Ptac-MCS5-sodB</b>       | <i>sodB</i> (SO_2881) in pBBR1-TT-Ptac-MCS5, Gm <sup>r</sup>                                           | This work                    |

Abbreviations: Km<sup>r</sup>, kanamycin resistance; Tc<sup>r</sup>, tetracycline resistance; Gm<sup>r</sup>, gentamicin resistance

**Table S2** Oligonucleotides used in this study

| Name                                 | Sequence (5'-3')                                                               | Enzyme |
|--------------------------------------|--------------------------------------------------------------------------------|--------|
| <b>Knock-out/knock-in constructs</b> |                                                                                |        |
| EcoRI-KO_lysis-us-Fw                 | TCT <u>ATG AAT TCC</u> AAC CCA TCT AAC GAG AAT GCA GG                          | EcoRI  |
| Sall-KO_lysis-ds-Rev                 | CTA <u>GTC GAC</u> GGC AGA TTT ATC GGC TGG AGC                                 | Sall   |
| Ol-KO_lysis-SO_2966-up-Rev           | TAT GAA TAA GAC AGC GTG AAA CAA AAA AAC TCA CTT G                              | -      |
| Ol-KO_lysis-SO_2974-ds-Fw            | TTC ACG CTG TCT TAT TCA TAG ATG CCC CAA AAC AAA AAG                            | -      |
| chk-KO_lysis_Fw                      | ATT GGC ACC GTA AGA GAT GGT GG                                                 | -      |
| chk-KO_lysis_Rev                     | ATA AGC TTC TTG CGA GAC TAA ACC G                                              | -      |
| BamHI-drecA-us-fw                    | ATA <u>GGA TCC</u> GGC GTG TTG AAA TTG ATA AGG GA                              | BamHI  |
| drecA-OL-us-rev                      | ATG AAG GTC GAT GGC GAA GTG TTC TGA GTC AGT C                                  | -      |
| drecA-OL-ds-fw                       | GAA CAC TTC GCC ATC GAC CTT CAT TCC TGT TCC C                                  | -      |
| Sall-drecA-ds-rev                    | CTA <u>GTC GAC</u> CCA CGG GCA GTG AGA GAA ATA CC                              | Sall   |
| drecA-chk-fw                         | GTG GCG TAA AAG TGG TGG AAA CG                                                 | -      |
| drecA-chk-rev                        | AGG GAA TGC CCG CCA TAG GG                                                     | -      |
| NheI_KO_oxyR_Fw                      | ACT <u>GCT AGC</u> CAA TTG GTG CCG GTA CTC TAC T                               | NheI   |
| US_KO_oxyR_Rev                       | ATT GTG CCG TTA AAT TTT TCA TTT TAT CGA TTG CCA C                              | -      |
| DS_KO_oxyR_Fw                        | GAA AAA TTT AAC GGC ACA ATA ACT GAG TAT TTT GCC TG                             | -      |
| Sall_KO_oxyR_Rev                     | ACT <u>GTC GAC</u> GCG ATT ATC GTT TTA GCC GCT TG                              | Sall   |
| chk_oxyR_Fw                          | CCT AGA TCT CAA TAC ATT AGA ACA G                                              | -      |
| chk_oxyR_Rev                         | GTT GCC TCG ACT ACC CAC GC                                                     | -      |
| PspOMI_KO_fur_Fw                     | ACT <u>GGG CCC</u> CAG TAA CCC TGC GAT GTT GA                                  | PspOMI |
| US_KO_fur_Rev                        | GAC AGA TGG AAA CGA CGA ATA AGC TTG CTC GGC                                    | -      |
| DS_KO_fur_Fw                         | ATT CGT CGT TTC CAT CTG TCA TTG CTA ATC TCT TG                                 | -      |
| NheI_KO_fur_Rev                      | ACT <u>GCT AGC</u> CAA CCA ATA ACT GCC CAG AAA ACT C                           | NheI   |
| chk_fur_Fw                           | CGA GCA GGA TGT TGA TGC CCT C                                                  | -      |
| chk_fur_Rev                          | CCA GCA CGC TCA TGT AAA TCA TC                                                 | -      |
| EcoRI_KO_oxyR_Rev                    | ACT <u>GAA TTC</u> GCG ATT ATC GTT TTA GCC GCT TG                              | EcoRI  |
| Seq-oxyR-Fw                          | TCC ATA ACC TTA GTG GCA ATC G                                                  | -      |
| Seq-oxyR-Rev                         | CCT TTA TAA GAC TCA CAA CAG GC                                                 | -      |
| <b>Venus insertions</b>              |                                                                                |        |
| lambdaSo-cro-6xHis-OL-Rev            | AAG CAT CAT CAT CAT CAT TAA TTA ACT TAC GAA CAG GAT AAC                        | -      |
| venus-6xHis-OL-Rev                   | TTA ATG ATG ATG ATG ATG CTT GTA CAG CTC GTC CAT GCC GAG                        | -      |
| lambdaSo-cro-RBS-OL-Fw               | CTT GCT CAC CAT GTC AGT CCT CCT CTA GGC AAC TTG GTT TGA TTC                    | -      |
| venus-RBS-OL-Fw                      | AGG AGG ACT GAC ATG GTG AGC AAG GGC GAG GAG                                    | -      |
| BamHI-lambdaSo-cro-US-Fw             | ATA <u>GGA TCC</u> GCT GGA ATG GTA TGA ACG                                     | BamHI  |
| EcoRI-lambdaSo-cro-DS-Rev            | TCT <u>ATG AAT TCG</u> AGT CTC AGC ATC AAT AG                                  | EcoRI  |
| lambdaSo-KLtail-6xHis-OL-Rev         | AAG CAT CAT CAT CAT CAT TAA AAG CAT TTT CCC GCC GTC AGC                        | -      |
| lambdaSo-KLtail-RBS-OL-Fw            | CTT GCT CAC CAT GTC AGT CCT CCT TTA ACG TAT TAG CCG CAC GCT                    | -      |
| BamHI-lambdaSo-KLtail-US-Fw          | ATA <u>GGA TCC</u> CTT GCT CGC CTT CCC ACC                                     | BamHI  |
| EcoRI-lambdaSo-KLtail-DS-Rev         | TCT <u>ATG AAT TCG</u> GCC AGC GCA GTT AGA AG                                  | EcoRI  |
| chk-lambdaSo-cro-venus-Fw            | GCG CTT CAT GCT CGA TTG CGG C                                                  | -      |
| chk-lambdaSo-cro-venus-Rev           | CAT AGA GGA TCT CAG CAG GTG TTA CG                                             | -      |
| chk-lambdaSo-KLtail-venus-Fw         | CAG CGC TAC AAA TCC AGC CTT GGC                                                | -      |
| chk-lambdaSo-KLtail-venus-Rev        | CCC GCG CGG ATT ATC CAT TGG C                                                  | -      |
| venus-Strep-OL-Rev                   | GAT TTA TTT TTC GAA CTG CGG GTG GCT CCA GCC CTT GTA CAG CTC GTC<br>CAT GCC GAG | -      |
| lambdaSo-2974-RBS-OL-Fw              | CTT GCT CAC CAT GTC AGT CCT CCT AGA TGC CCC AAA ACA AAA AGC                    | -      |
| lambdaSo-2974-Strep-OL-Rev           | TGG AGC CAC CCG CAG TTC GAA AAA TAA ATC ATG AAT AAG ATT TTG ATG<br>AGT         | -      |
| EcoRI-lambdaSo-2974-US-Fw            | TCT <u>ATG AAT TCC</u> CGT ATT GAT ACG TCC AAT CG                              | EcoRI  |

|                           |                                                   |      |
|---------------------------|---------------------------------------------------|------|
| Sall-lambdaSo-2974-DS-Rev | CTA <u>GTC GAC</u> GAC TAA ACC GTA CTA GCG GCG GC | Sall |
| chk-PR'-SO_2974_venus-Rev | CCA CGC ATC GGA GAG GCT AAC C                     | -    |
| chk-PR'-SO_2974_venus-Fw  | GTG TAC TGG CGT GCA GCA AAT AAG C                 | -    |

### Operon mapping

|                   |                                        |   |
|-------------------|----------------------------------------|---|
| OM-2974-2975-Fw   | GAT TAG TAA CAC TCA TCA AAA TCT TAT TC | - |
| OM-2974-2975-Rev  | GGA ATT AAG GAT GAG TTT GGC CG         | - |
| OM-2973-2974-Fw   | ACC TTG GAT AAG ATG GCC ACG            | - |
| OM-2973-2974-Rev  | GTT GCA CAT GAT AAA AGT GAA TTA GC     | - |
| OM-2972-2973-Fw   | GCC AGC AAA TCA AGA CTG CCG            | - |
| OM-2972-2973-Rev  | CAT TGC TGT TGC CAG AGT ATC G          | - |
| OM-2971-2972-Fw   | GAA GAG TGC GAT TGT TGA TGC G          | - |
| OM-2971-2972-Rev  | CAG GTA TTC GAA AGG TCC AGC            | - |
| OM-2970-2971-Fw   | CTA TTT ACC AAG TGG CTG ATG GC         | - |
| OM-2970-2971-Rev  | GCG ATG ATT ATG GAT AAA GCA ACG        | - |
| OM-2969-2970-Fw   | CGT GGC AAT GCT TGC ACA GC             | - |
| OM-2969-2970-Rev  | CCA CTG GTA CCT GCT GAT TGG            | - |
| OM-2968-2969-Fw   | GAG TAC GCC CAT GTC TTT AAG C          | - |
| OM-2968-2969-Rev  | AGC GTG GTT ACG GTG GAC G              | - |
| OM-2967-2968-Fw   | ATC CTT CCA GCC GAA CAG CG             | - |
| OM-2967-2968-Rev  | AAC TTA CCA AAG CAT CAA AAT CAT CG     | - |
| OM-2966-2967-Fw   | GAC CAA CCA AGT CCA AAC AGG            | - |
| OM-2966-2967-Rev  | CAC TGT TTG AGA TAA AAA GCA TCG G      | - |
| OM-2965-2966-Fw   | AAG TCG ATA TCC ATG CGG TGC            | - |
| OM-2965-2966-Rev  | TGG TCG CTG TTA TCT GGT TCG            | - |
| OM-2964-2965-Fw   | GCC TGG GGA ATT GAT ATA AAC GG         | - |
| OM-2964-2965-Rev  | ACA ACG GCA AAC CCA ATA CGC            | - |
| OM-2963-2964-Fw   | CTC ACC GAT TGA CTG CTC GC             | - |
| OM-2963-2964-Rev  | AGC CGA TGA AAT TGG TGA GAC C          | - |
| OM2-2968-2969-Fw  | CAT GCG GCT TTG GCT CTT GGG            | - |
| OM2-2968-2969-Rev | CTT CTT AAA GCG CAA TCC TCT CTG C      | - |
| OM2-2970-2971-Fw  | CGT TGG TTT GGG CAG TAA TGG C          | - |
| OM2-2970-2971-Rev | GCT ATG TCG CTT CAA TCT CTA CGG        | - |

### Promoter fusion studies (pBBR1-TT-MSC5-RBS-venus)

|                              |                                                                |        |
|------------------------------|----------------------------------------------------------------|--------|
| PspOMI_pXVENC-2_RBS_Venus_Fw | ACT <u>GGG CCC</u> AGG AGG GCA AAT ATG GTG AGC AAG GGC GAG GAG | PspOMI |
| KpnI_pVENC-2_Venus_Rev       | ACT <u>GGT ACC</u> TTA CTT GTA CAG CTC GTC CAT GCC             | KpnI   |
| EcoRI_PtonB_Fw               | ACT <u>GAA TTC</u> ACC CGT AAC AGT CAT TCG CCC                 | EcoRI  |
| PspOMI_PtonB_Rev             | ACT <u>GGG CCC</u> GGC AAA CCT TCC AAT TCC AAA AGC             | PspOMI |
| BamHI_Pdps_Fw                | ACT <u>GGA TCC</u> AGG GTT AAT AGG ATT TTC ACT GG              | BamHI  |
| EcoRI_Pdps_Rev               | ACT <u>GAA TTC</u> TCC TCC TAT TGT CCT ACT CGA TG              | EcoRI  |

### sodB over-expression

|                  |                                                                |      |
|------------------|----------------------------------------------------------------|------|
| XhoI-RBS-sodB-Fw | TAT CTC GAG AGG AGG GCA AAT ATG GCT TTC GAA TTA CCC GCA TTA CC | XhoI |
| KpnI-sodB-Rev    | CTG GGT ACC TTA ACC TGC GAA GTT TTG GTT CAC G                  | KpnI |

### Quantitative real-time PCR

|               |                               |   |
|---------------|-------------------------------|---|
| katB-qPCR-Fw  | CAC TTC AAA TCG CAG CAA GGC G | - |
| katB-qPCR-Rev | GGC ATG ATC TGC ACA TTC ACC G | - |
| dps-qPCR-Fw   | TGG CAT AGG CTG AAT AGG AGC C | - |
| dps-qPCR-Rev  | CGT CAC TGG TCC TAT GTT CAC C | - |

|                          |                                |   |
|--------------------------|--------------------------------|---|
| <b>katG1-qPCR-Fw</b>     | ATC TAC CGC GAA ATC ACC ACG C  | - |
| <b>katG1-qPCR-Rev</b>    | CTT GCC AAA TCA GTG CTT CGG C  | - |
| <b>ahpC-qPCR-Fw</b>      | TCA CGA AAG TAC CAC GCA GTG C  | - |
| <b>ahpC-qPCR-Rev</b>     | CAT GGC ACG ATA CTT CTG ACA CC | - |
| <b>tonB-qPCR-Fw</b>      | TCG CAG GAG CAT CAC TAC ACC    | - |
| <b>tonB-qPCR-Rev</b>     | AAC CAC GGT TTG ATG AGG CGC    | - |
| <b>16s-rRNA-qPCR-Fw</b>  | AGG TTC ATC CAA TCG CGA GAG G  | - |
| <b>16s-rRNA-qPCR-Rev</b> | GTT TAC TCA TGA GGT GGC GAG C  | - |
| <b>recA-qPCR-Fw</b>      | TCA CAT CAA CCG CAC CAG AAC G  | - |
| <b>recA-qPCR-Rev</b>     | CGC TCT TGA TCC TAT CTA CGC G  | - |

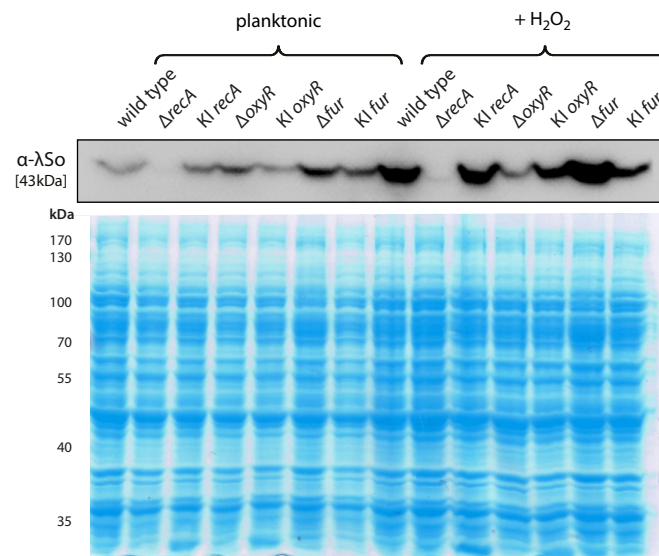

**Figure S1. Western immunodetection of phage  $\lambda$ So in in-frame deletion strains and complementation strains in the absence and presence of H<sub>2</sub>O<sub>2</sub>.** The strains were grown until mid-logarithmic phase in plain LM medium (+15 mM lactate) and then incubated with (LM+ H<sub>2</sub>O<sub>2</sub>) or without (LM) 2 mM H<sub>2</sub>O<sub>2</sub> for 3h hours at 30°C and then subjected to SDS-PAGE and immunodetection.  $\Delta$ , in-frame deletion; KI, in-frame reinsertion/knock-in.

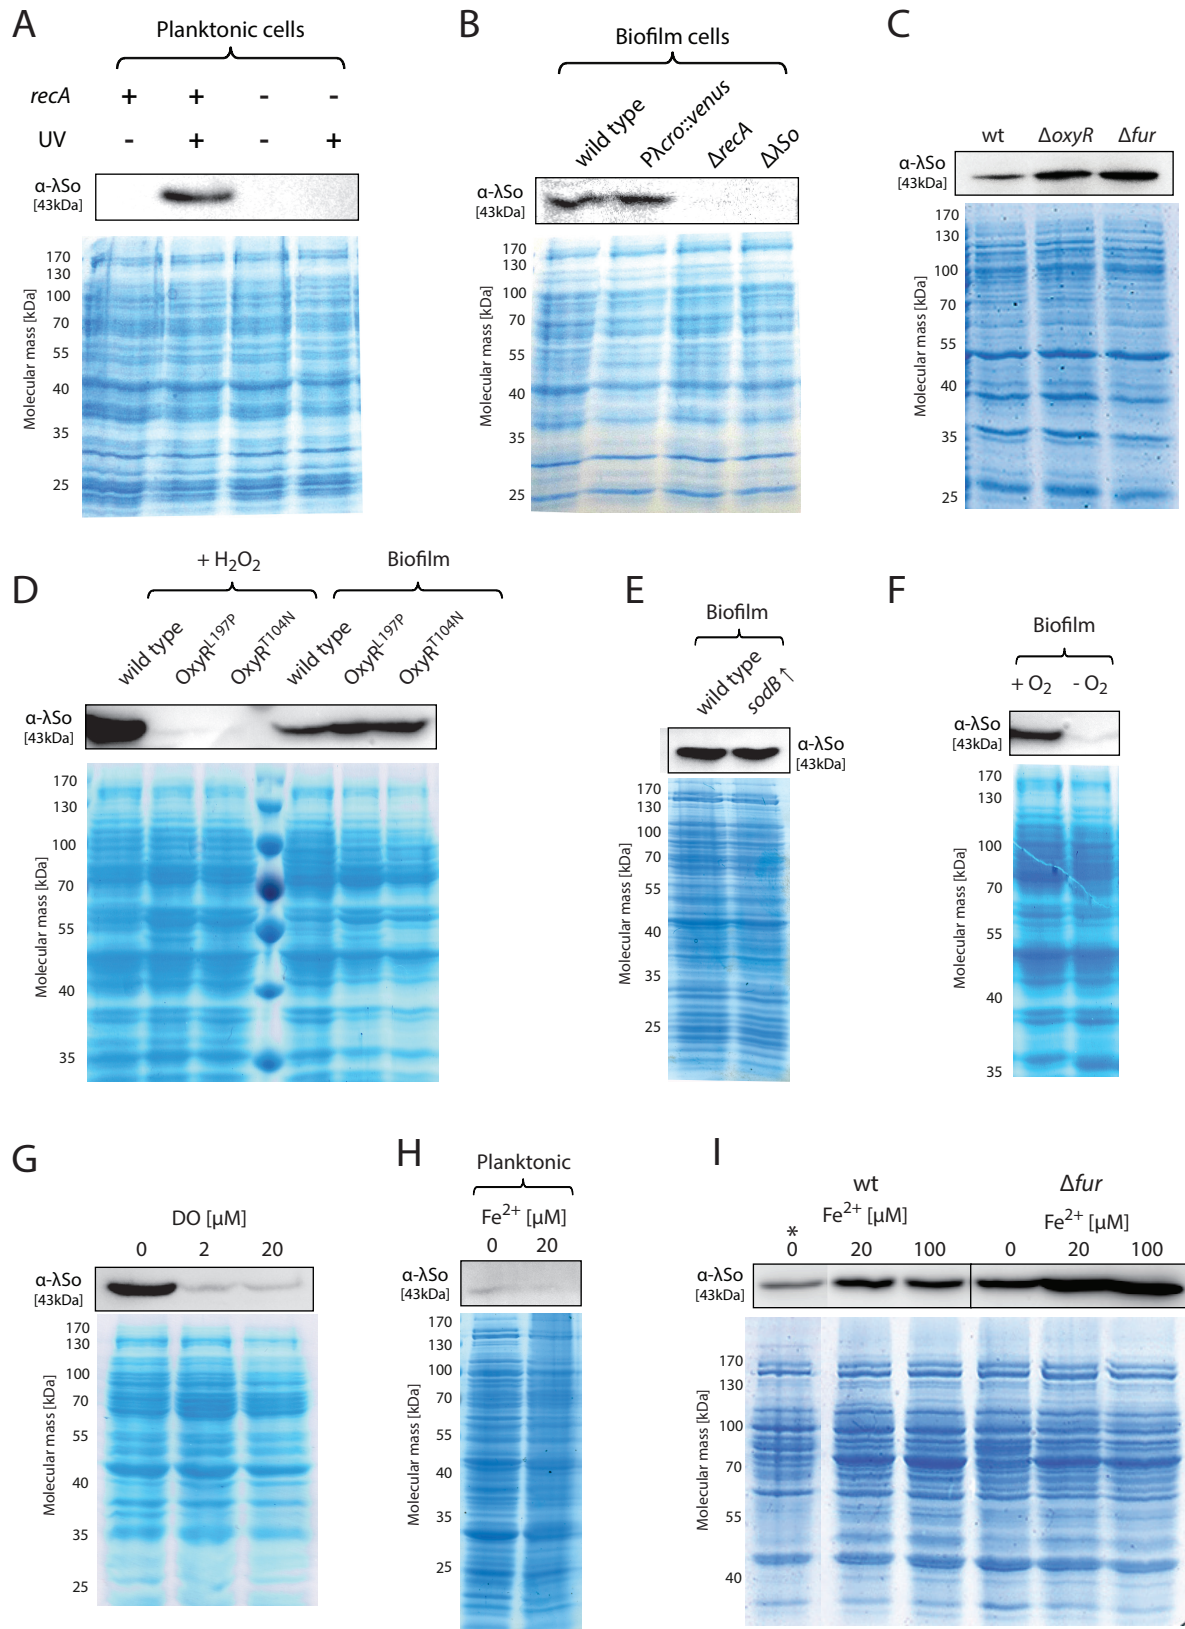

**Figure S2. SDS-PAGE loading controls for λSo Western immunodetection assays.** For each analysis, one SDS-PAGE gel was stained with Roti-Blue for visual analysis. Depicted are SDS-PAGE loading controls for Figure 2A (A), Figure 2C (B), Figure 3A (C), Figure 4C (D), Figure 4D (E), Figure 4E (F), Figure 5D (G), Figure 5E (H) and Figure 5F,G (I). \*Lane 1 (wild type without additional ferrous iron) was located elsewhere on the same gel/blot and was copied next to the other lanes for direct comparison.



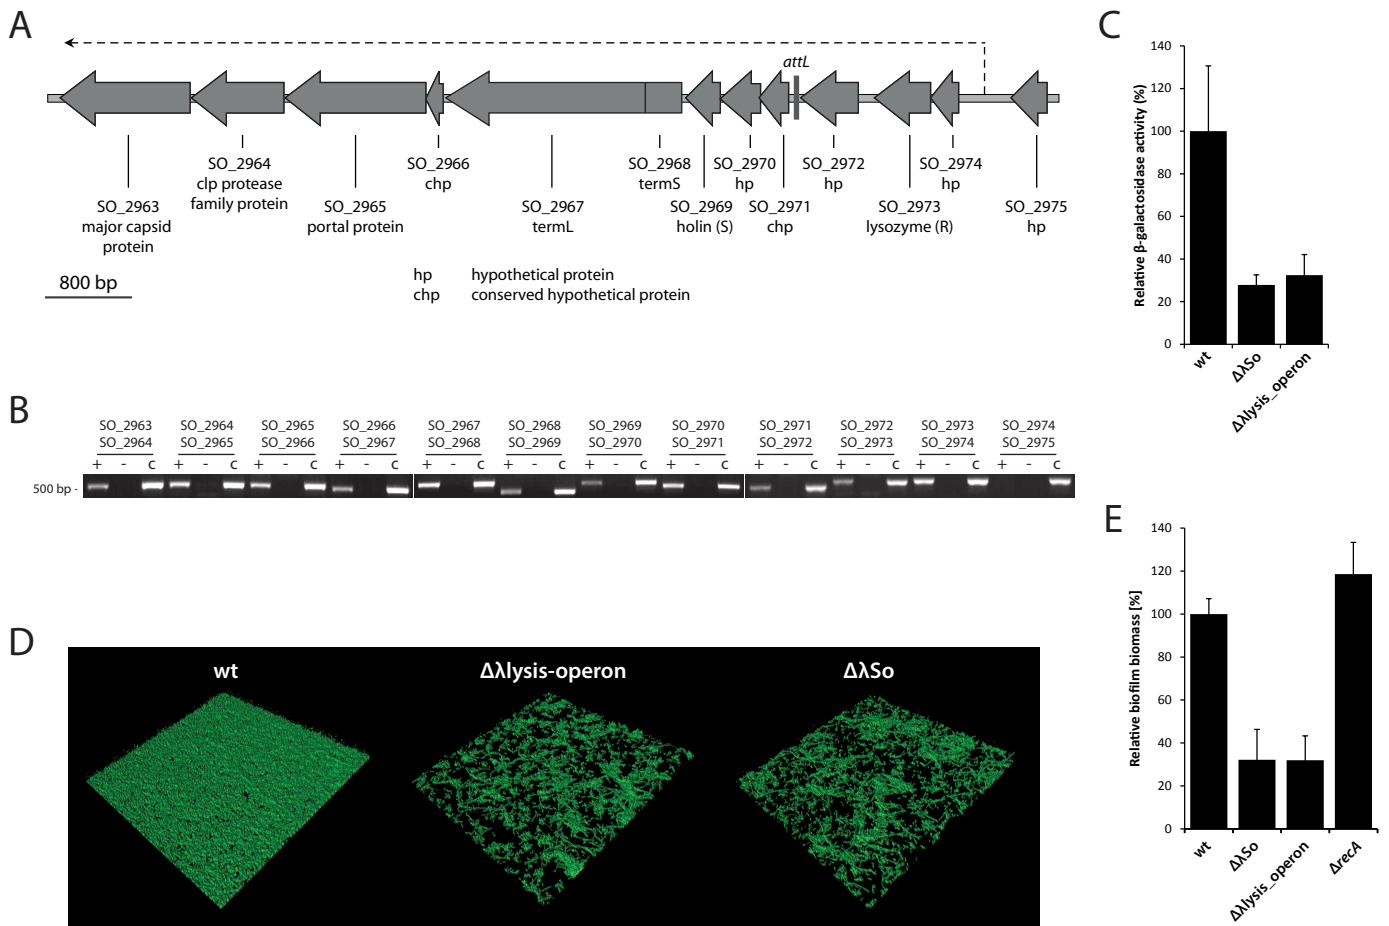

**Figure S3.  $\lambda$ So prophage-mediated lysis is required for normal biofilm formation.** (A) Genetic and transcriptomic organization of cluster SO<sub>2963</sub> to SO<sub>2975</sub>. Predicted genes are indicated as grey arrows. Gene transcription starts at gene SO<sub>2974</sub> and continues at least until gene SO<sub>2963</sub>, as indicated by RT-PCR analysis. Bioinformatic predictions are based on NCBI BLAST (National Library of Medicine) and PHAST (6) analyses. (B) Operon mapping using RT-PCR on genes SO<sub>2963</sub> to SO<sub>2975</sub> on cDNA samples (+) using appropriate primer pairs bracketing the gaps between the genes of interest. A corresponding total-RNA (-) sample taken before reverse transcription served as negative control, and chromosomal DNA (c) served as positive control. The PCR products were analyzed by 2% agarose gel electrophoresis. PCR amplification products were obtained for all genes except SO<sub>2974</sub> and SO<sub>2975</sub>, indicating that that genes SO<sub>2966</sub> to SO<sub>2974</sub> reside on a single transcript. (C) Relative extracellular  $\beta$ -galactosidase activity of strain S2933 ( $\Delta$ lysis-operon) and S1387 ( $\Delta$ λSo) in comparison to the wild type. All strains harbored plasmid pME6031-PmotB-lacZ for constitutive cytoplasmic expression of  $\beta$ -galactosidase. Black bars represent mean values of biological and technical triplicates with standard deviations. Lysis was suppressed to a similar degree as in a  $\lambda$ So deletion mutant, indicating that deletion of gene cluster SO<sub>2966</sub> to SO<sub>2974</sub> is sufficient to completely suppress  $\lambda$ So-mediated cell lysis (D) CLSM projections of 24 hours-old biofilms formed by the wild type, the lysis operon deletion mutant ( $\Delta$ lysis-operon) and the  $\lambda$ So prophage deletion mutant  $\Delta$ λSo under hydrodynamic conditions in flow cells. All strains were tagged with Gfp. The lateral edge of each micrograph is 250  $\mu$ m. The results indicate that a mutant lacking the  $\lambda$ So lysis-operon displays a biofilm-deficient phenotype highly similar to that observed for a complete  $\lambda$ So deletion. (E) Relative biomass as a measure of total fluorescence compared to the wild type of 24 hours-old biofilms formed by strain  $\Delta$ λSo (relative Gfp values),  $\Delta$ lysis\_operon (relative Gfp values) and strain  $\rho$ λcro::venus  $\Delta$ recA (relative Cfp values) under hydrodynamic conditions in flow cells. Bars represent the mean values (in %) with standard deviations displayed as error bars, obtained from two independent experiments conducted at least in duplicates.

Prophage  $\lambda$ So (*S. oneidensis* MR-1)

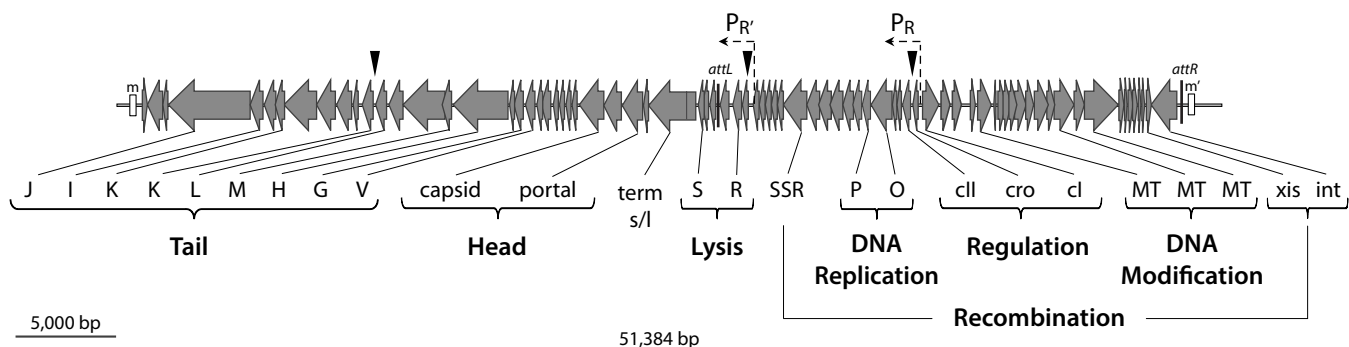

**Figure S4. Genetic organization of prophage  $\lambda$ So and site-specific transcriptional fusion constructs.** Predicted genes are indicated as grey arrows. Gene nomenclature is based on homologies to *E. coli* phage Lambda. Abbreviations for predicted putative genetic elements: m/m', cohesive ends (*cos* sites); *attL/R*, attachment sites; terms/term<sub>l</sub>, small and large subunit of phage terminase; SSR, Site-specific recombination protein; MT, methyltransferase; P<sub>R</sub>, promoter for early transcription; P<sub>R'</sub>, promoter for late transcription. Black arrows indicate the integration site for *venus* constructs used for transcriptional fusion to genes *cro*, promoter P<sub>R'</sub>, and gene L.

**A**

```

S.o. : MKNLPSLKNLYLVNHLHQEQNENRAAKVCFVSCSTLSSGIQNLLEEQLGHQLTERDHSFMTAIGEEVVQRSRKILTD : 78
S.p. : MKSLPSSLKNLFLVNLHQEQNENRAAKVCFVSCSTLSSGIQNLLEEQLGHQLTERDHSFMTAIGEEVVQRSRKILTD : 78
X.c. : ----MNLRLDKLYLVALADHKHFRGAASACFVSCPTLSTQIKKLEDELGVSLVERAPRKVMLTPAGREAAVRSIVAE : 74
V.c. : ----MNIKDFEYLVALADHKHFRKAAEACFVSCPTLSSGIQIRKLEDEIGTTLLERSRRVLFTEAGLQLVDQAKKILSE : 74
P.a. : ----MTLTELRLYIVTLAQEQHFRGAAERCHVSOPTLSVGVKKLEDELGVLIERSKSAVRLTPVGEIVVAQAKVLEQ : 74
E.c. : ----MNIKDFEYLVALAEHRHFRRAADSCHVSCPTLSSGIQIRKLEDELGVMLLERTSRKVLFTQAGMLLDQARTVLEQ : 74
R.s. : -MMNISMKHLRYFEALARHQHFGHAAEACRITQPALSLQMKLEEMTGAALIERGPKRIRLTSLGEDFVARAREILRA : 77

S.o. : VDDLVLVKNQGEPMTCDIRLGCCTPLAPFLSRVVKQCQQAYPEMSLLKEDDTERLLDAIGKGELELLLIILALPVDT : 156
S.p. : VDDLVLVKNQGEPMTCDIRLGCCTPLAPFLSRVVRQCQQAYPAMSLLLKEDDTERLLDAIGKGELELLLIILALPVDT : 156
X.c. : VEQMKEAARRSQDPEACTVRLGCFPTLAPYLLPHVVPRIQRFRPRELELLLEKSDQLMHQDREGRLDAALLALPLQD : 152
V.c. : VKTFKDMANQQTGAMTGPLHIGFPTLGPYLLPKIIPTLKERFPELELYLHBAQTNQLVROEECKLDCLVLASVEET : 152
P.a. : AQQGIRELAQAGKNQLAAPLKVCAIYTTGPLYFPHLIPQLHRVAPQMPLYIEENFTHILRDKLRTGELDAIIIALPFQE : 152
E.c. : VKVLKEMASQQGETMSEPLHIGLPTVGPYLLPHIIPMLHQTFPKLEMYLHBAQTHQLLAQLDSGKLDCLVILALVKES : 152
R.s. : VDELGLLARASGEALHCRFRLLGVLETVAPYLLPAIIQLLARHHPRLDLRPRRATTRKLLADLNEGRLEDAAIMALPVSE : 155

S.o. : SGYHSMKVGIDPFKMTVHKDLVGGIHPIDYQTLDPDESIFLQSEHCITGHAITACQLGDSAKVN---PFAATSLHTL : 231
S.p. : SGYHSMKVGIDPFKMTVHKDLAGEIHPIDYQALDPDESIFLQSEHCITGHAITACQLGDSAKVN---PFAATSLHTL : 231
X.c. : DQLHAEFLEFEEPFVLAYPEGHPLSRHDSMTLDDLSEQRLLLEDGHCRLDQALDVCHLAGALEK---SEFQATSLHTL : 227
V.c. : APFKEIELYNEVLSIAVPCDHAWAARDEVDMLELKGKTVLALGDGHCLRDQALGFCFAAGAKDD---ERFKATSLHTL : 227
P.a. : ADVLTKPLFDEPFYVLM PADHPWTAKASIDSELLNDKSLLEGGHCFRDQVLEACPVRKGDENKHTTVESSSLHTL : 230
E.c. : EAFIEVPLFDEPMLLAIYEDHPWANRECVPMADLAGEKLLLEDGHCRLDQALMGFCFEAGADED---THFRATSLHTL : 227
R.s. : PLLHEEPILEEEFMLVRPLAD--EGRPVPDSAGLREMRLLEEGHCFRDQALSFNMPAAPSD---LMEGSSSLHTL : 227

```

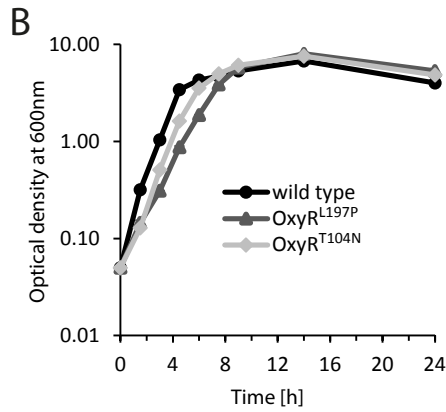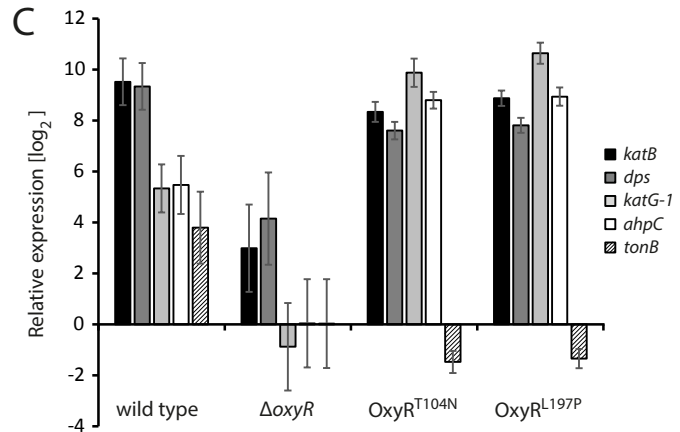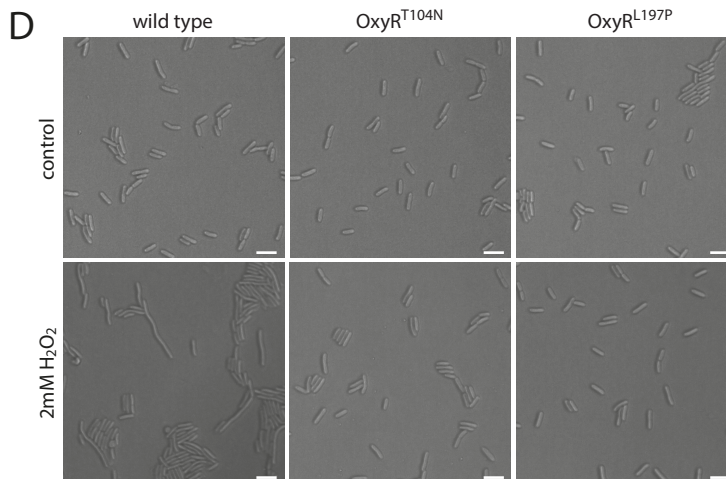

**Figure S5. Characterization of H<sub>2</sub>O<sub>2</sub> resistant mutants OxyR<sup>T104N</sup> and OxyR<sup>L197P</sup>.** (A) Alignment of OxyR protein sequences of *S. oneidensis* MR-1 (S.o.), *S. putrefaciens* CN-32 (S.p.), *Xanthomonas campestris* (X.c.), *Vibrio cholera* (V.c.), *Pseudomonas aeruginosa* PAO1 (P.a.), *Escherichia coli* (E.c.), and *Rhodobacter sphaeroides* (R.s.). Protein sequences were aligned by ClustalW2 (EMBL-EBI) using standard slow pairwise alignment options. Grey and black background colors highlight highly conserved amino acid residues. Green highlights the T104N amino acid substitution, red the L197P amino acid substitution, and yellow highlight conserved cysteine residues for disulfide bond formation under oxidizing conditions. (B) Planktonic growth under aerobic conditions in LB medium of the *S. oneidensis* MR-1 wild type and the OxyR<sup>T104N</sup> and OxyR<sup>L197P</sup> mutant strains. Growth curves are derived from a representative experiment conducted in triplicates. Error bars represent standard deviations (C) Relative expression to the wild type in response to 2 mM H<sub>2</sub>O<sub>2</sub> (15 min) of *katB* (SO\_1070), *dps* (SO\_1158), *ahpC* (SO\_0958), *katG-1* (SO\_0725) and *tonB* (SO\_3670) in the  $\Delta oxyR$  and the OxyR<sup>T104N</sup> and OxyR<sup>L197P</sup> mutant strains, determined by quantitative real-time PCR. Bars represent the mean values of two independent experiments, each normalized to the 16s rRNA and *recA* house-keeping genes. Standard deviations are displayed as error bars (D) Cell morphologies of the *S. oneidensis* MR-1 wild type and the H<sub>2</sub>O<sub>2</sub> hyper-resistant mutants after exposure to 2mM H<sub>2</sub>O<sub>2</sub> for 2 hours. The scale bar is 5  $\mu$ m.

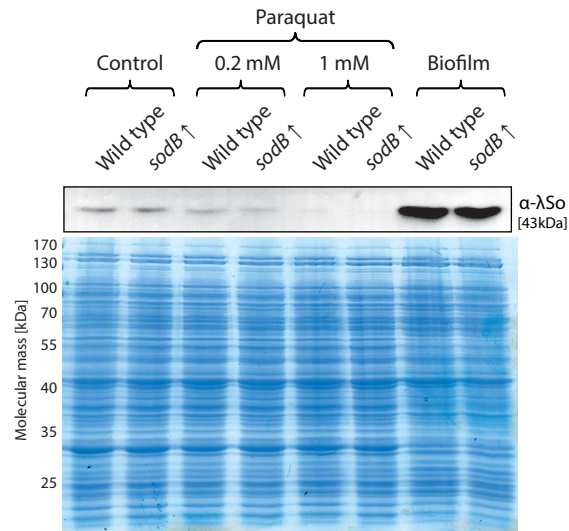

**Figure S6. Western immunodetection of phage  $\lambda$ So in the wild type and a wild type strain carrying plasmid pBBR1-TT-Ptac-MCS5-*sodB* for constitutive overexpression of the *sodB* gene (SO\_2881) in the absence or presence of 0.2 mM / 1 mM paraquat.** The strains were grown until mid-logarithmic phase in plain LM medium (+15 mM lactate), incubated with or without paraquat for 3h hours at 30°C and finally harvested and subjected to SDS-PAGE and immunodetection. Samples of both strains grown under hydrodynamic biofilm conditions were additionally included for direct comparison.

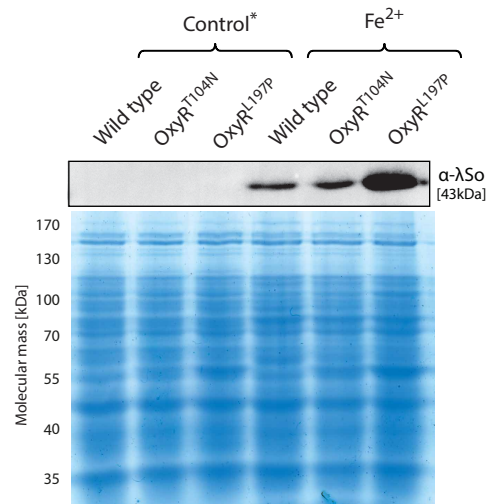

**Figure S7. Western immunodetection of phage  $\lambda$ So in biofilm cells of the wild type and the OxyR<sup>T104N</sup> and OxyR<sup>L197P</sup> mutant strains cultivated under static conditions in LM medium without (control) and with 20  $\mu$ M additional Fe<sup>2+</sup>. The corresponding SDS-PAGE gel (stained) is illustrated as loading control. \*no bands visible in the control samples due to the short exposure time that was necessary to avoid over-exposure of the Fe<sup>2+</sup> treated samples**

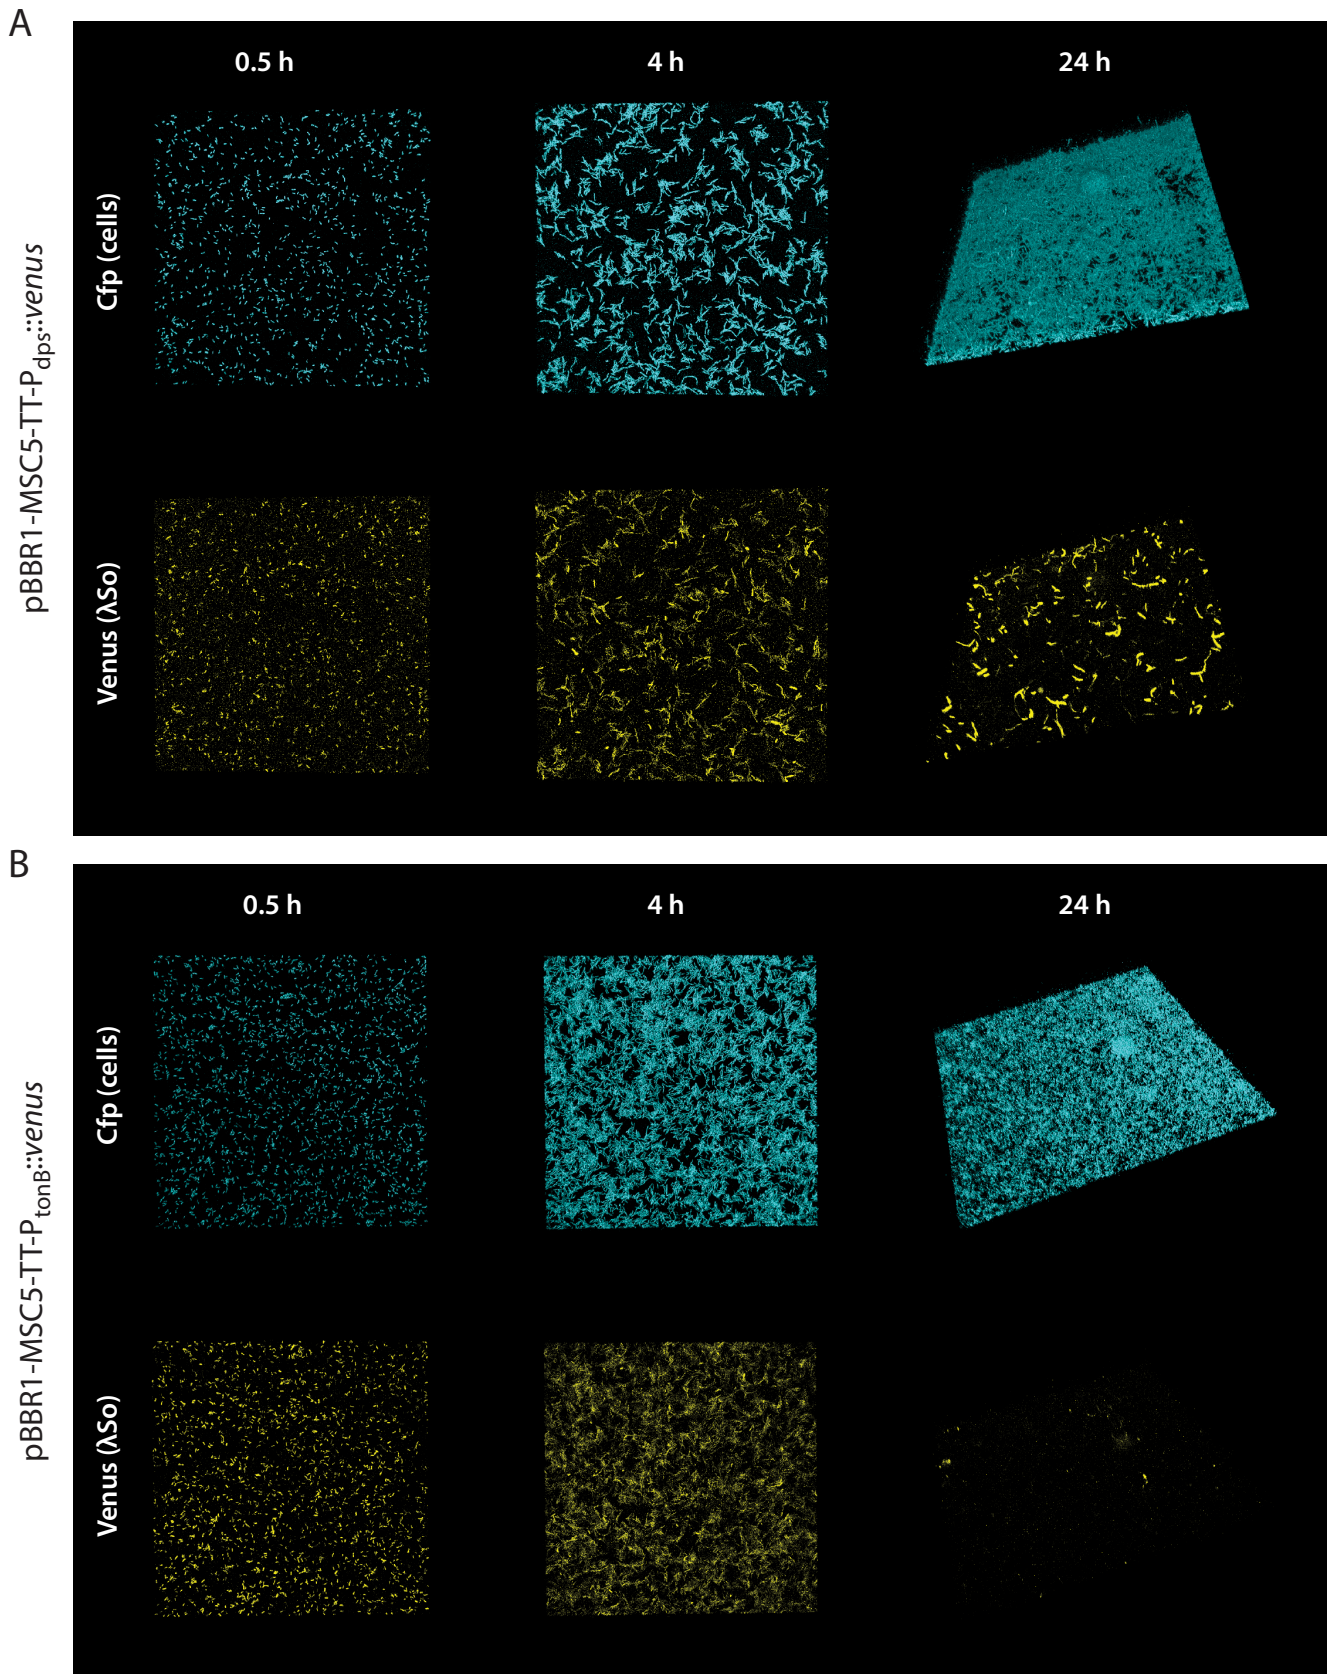

**Figure S8. Activity of promoter  $P_{tonB}$  (A) and  $P_{dps}$  (B) during biofilm development.** Displayed are CLSM images of 24 hours-old biofilms formed by Cfp-tagged *S. oneidensis* MR-1 wild-type strains harboring plasmid pBBR1-MSC5-TT-P<sub>tonB</sub>::*venus* or plasmid pBBR1-MSC5-TT-P<sub>dps</sub>::*venus* under hydrodynamic conditions in flow cells. Venus fluorescence is expected to positively correlate with promoter activity. The lateral edge of each micrograph is 250  $\mu$ m.

## Additional references

1. **Miller VL, Mekalanos JJ.** 1988. A novel suicide vector and its use in construction of insertion mutations: osmoregulation of outer membrane proteins and virulence determinants in *Vibrio cholerae* requires *toxR*. J Bacteriol **170**:2575-2583.
2. **Venkateswaran K, Moser DP, Dollhopf ME, Lies DP, Saffarini DA, MacGregor BJ, Ringelberg DB, White DC, Nishijima M, Sano H, Burghardt J, Stackebrandt E, Neilson KH.** 1999. Polyphasic taxonomy of the genus *Shewanella* and description of *Shewanella oneidensis* sp. nov. Int J Syst Bacteriol **49 Pt 2**:705-724.
3. **Lassak J, Henche AL, Binnenkade L, Thormann KM.** 2010. ArcS, the cognate sensor kinase in an atypical Arc system of *Shewanella oneidensis* MR-1. Appl Environ Microbiol **76**:3263-3274.
4. **Gödeke J, Paul K, Lassak J, Thormann KM.** 2011. Phage-induced lysis enhances biofilm formation in *Shewanella oneidensis* MR-1. ISME J **5**:613-626.
5. **Gödeke J, Heun M, Bubendorfer S, Paul K, Thormann KM.** 2011. Roles of two *Shewanella oneidensis* MR-1 extracellular endonucleases. Appl Environ Microbiol **77**:5342-5351.
6. **Zhou Y, Liang Y, Lynch KH, Dennis JJ, Wishart DS.** 2011. PHAST: a fast phage search tool. Nucleic Acids Res **39**:W347-352.
